# Supplementary material for: Particle number size distribution evaluation of Plantower PMS5003 low-cost PM sensors – a field experiment
Source: Royal Society of Chemistry journal article supplement (doi:10.1039/d4ea00086b), 2024-01-01
Supplement: d4ea00086b1.pdf [file d4ea00086b1.pdf]

Supporting Information - Particle number size  
distribution evaluation of Plantower PMS5003  
low-cost PM sensors – A field experiment

Alexandre Caseiro<sup>1</sup>, Seán Schmitz<sup>1</sup>, and Erika von Schneidemesser<sup>1</sup>

<sup>1</sup>Research Institute for Sustainability – Helmholtz Centre  
Potsdam, Potsdam, Germany

August 23, 2024

**S1 – Time series of raw particle counts**

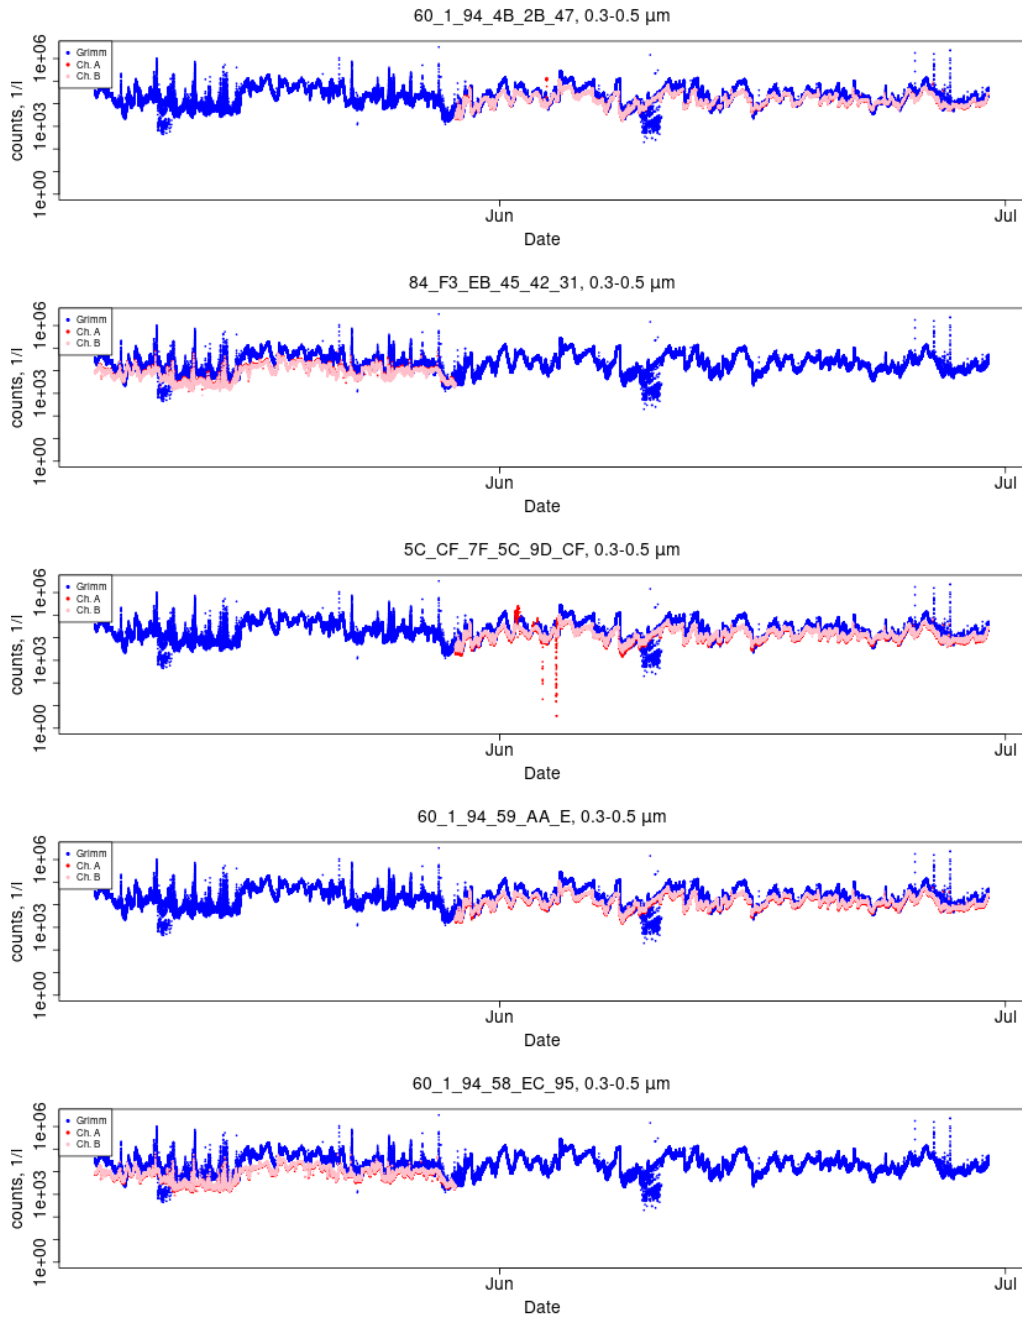

Figure S1: Time series of raw particle counts for the size bin 0.3–0.5 μm

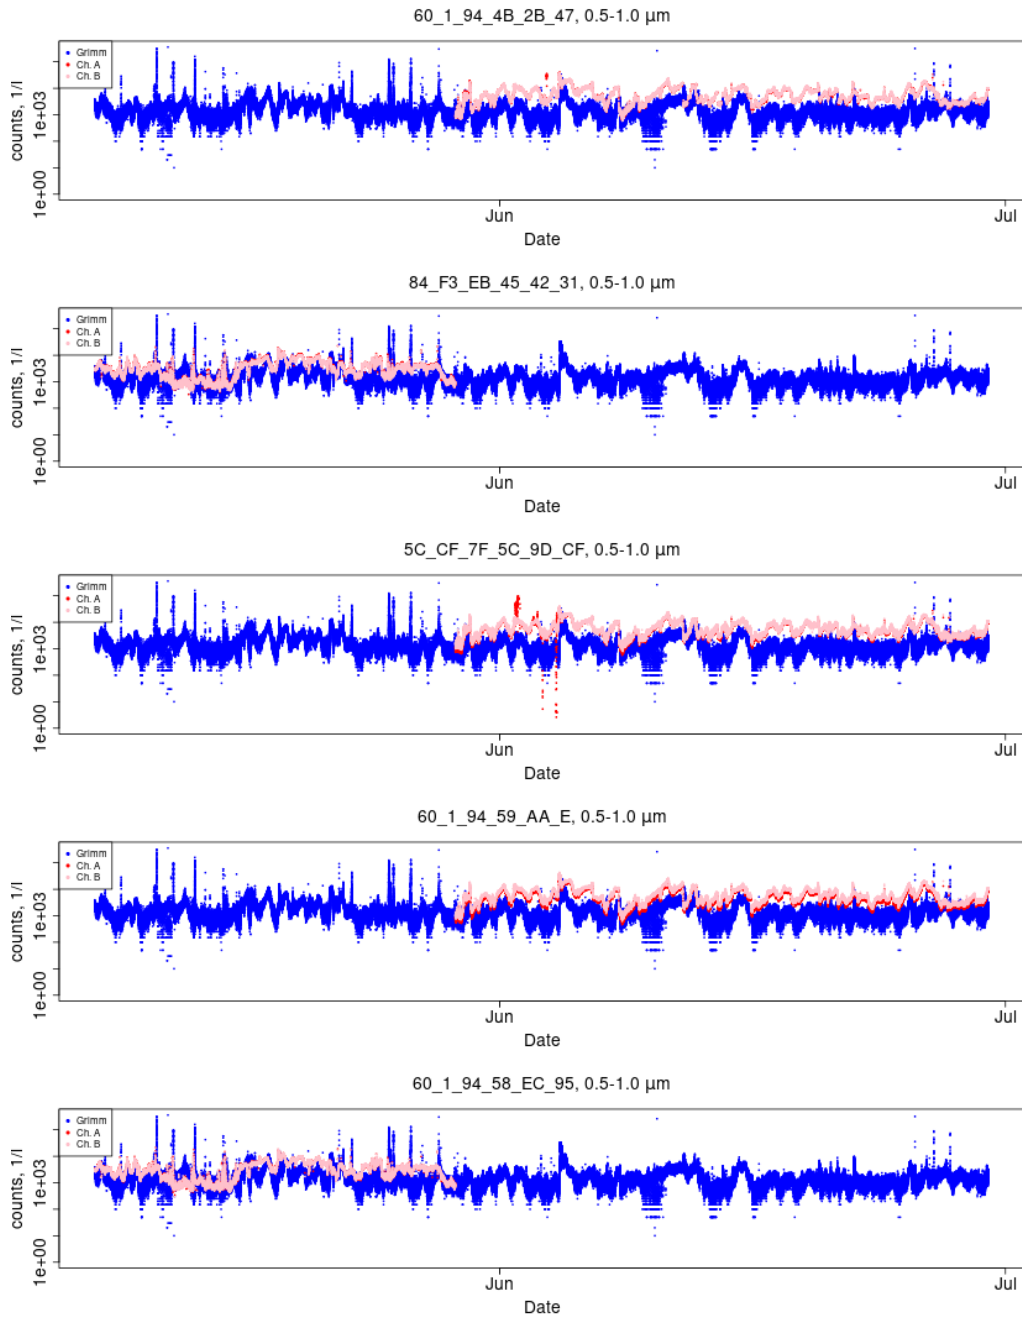

Figure S2: Time series of raw particle counts for the size bin 0.5–1.0 μm

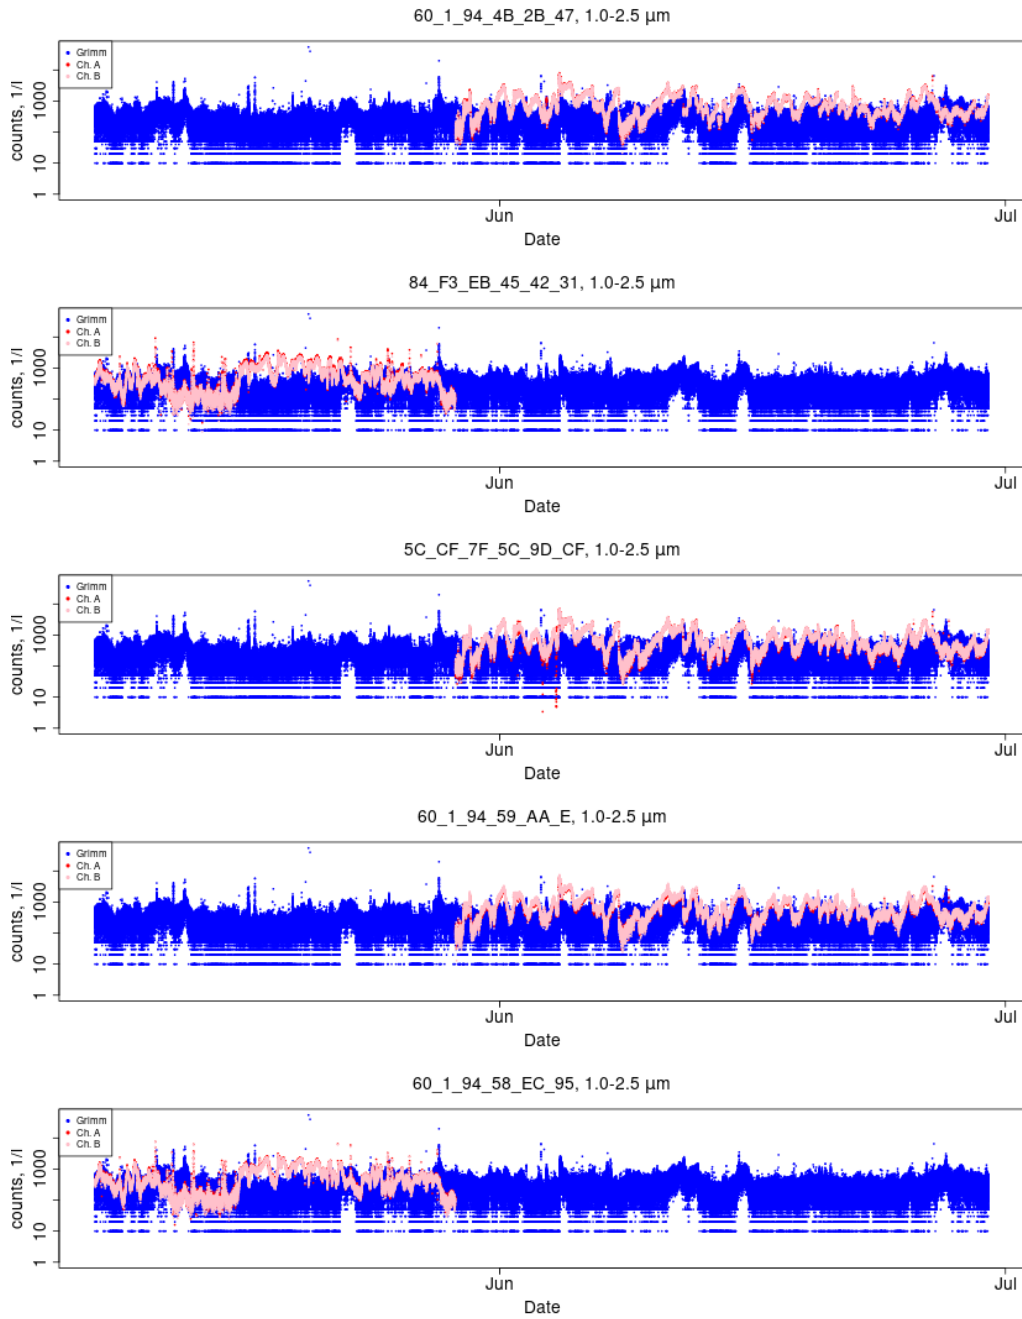

Figure S3: Time series of raw particle counts for the size bin 1.0–2.5 μm

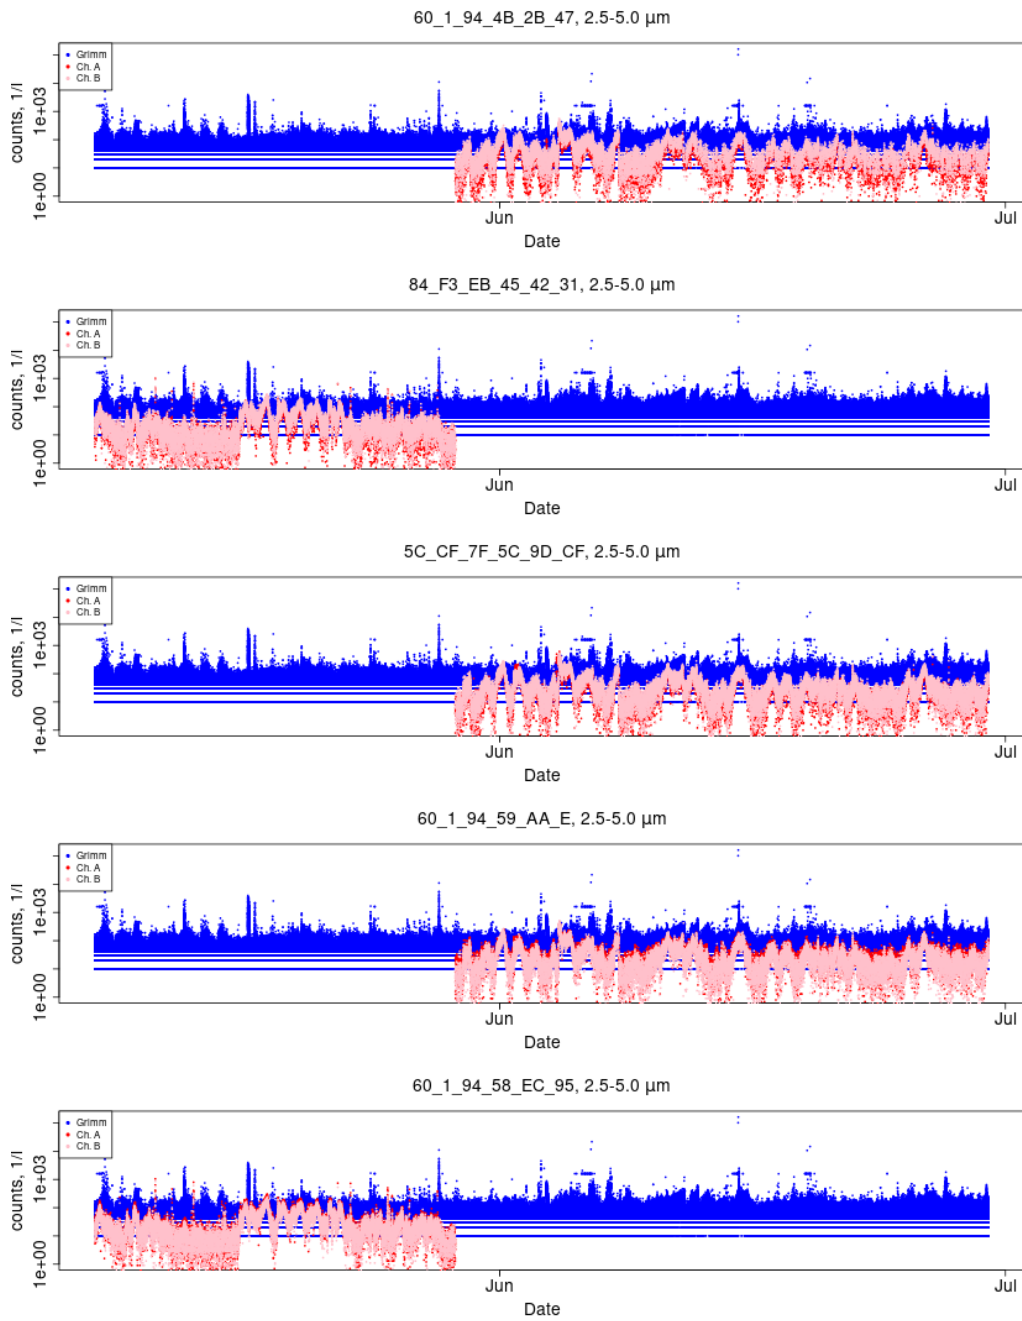

Figure S4: Time series of raw particle counts for the size bin 2.5–5.0 μm

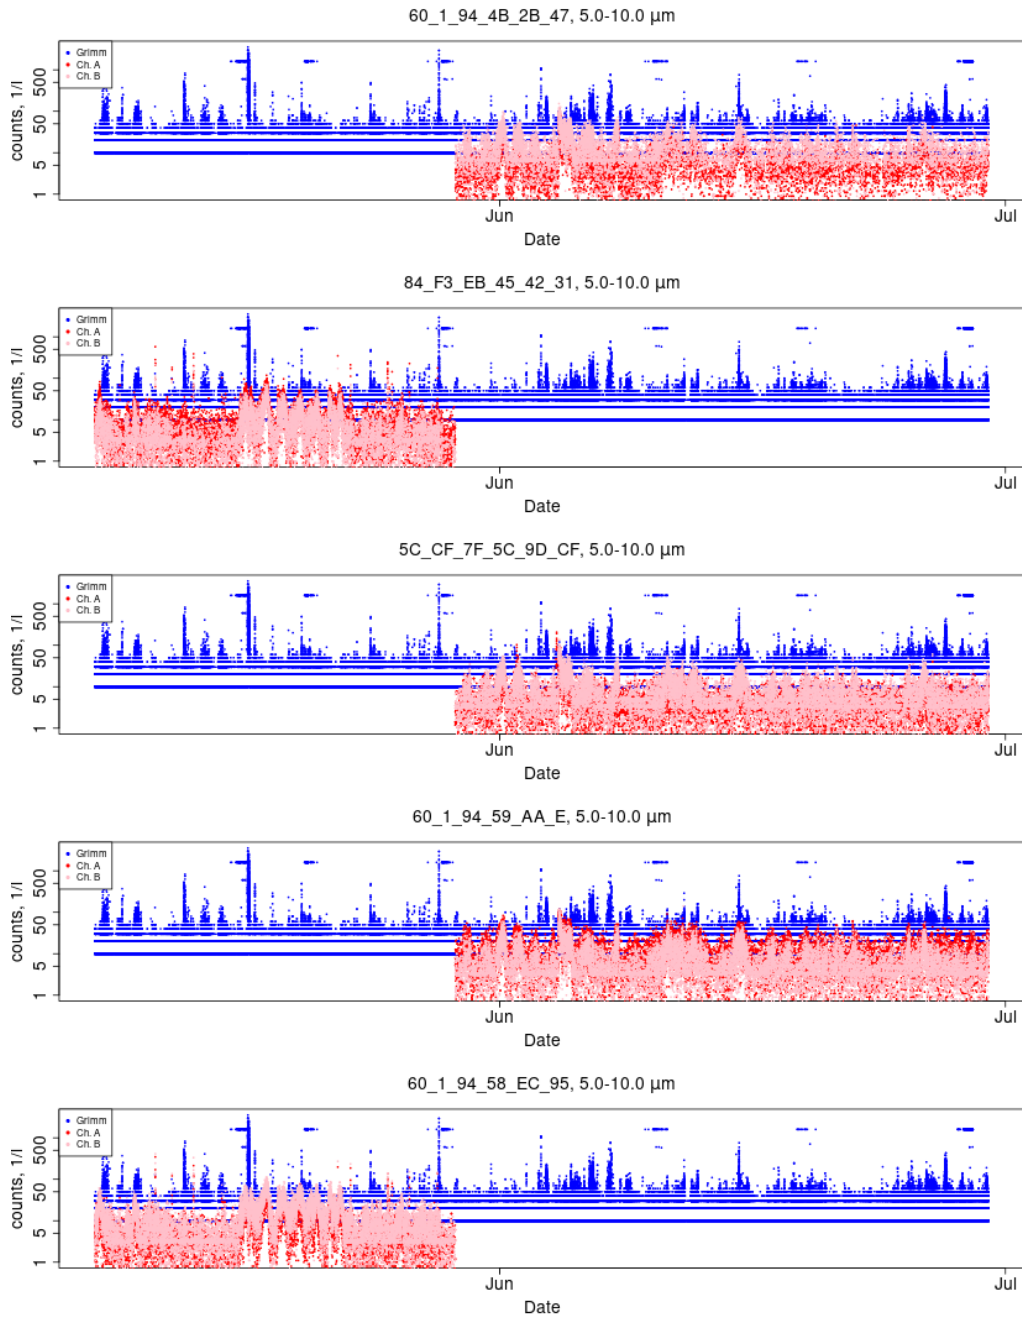

Figure S5: Time series of raw particle counts for the size bin 5.0–10 μm

## S2 – Influence of temperature

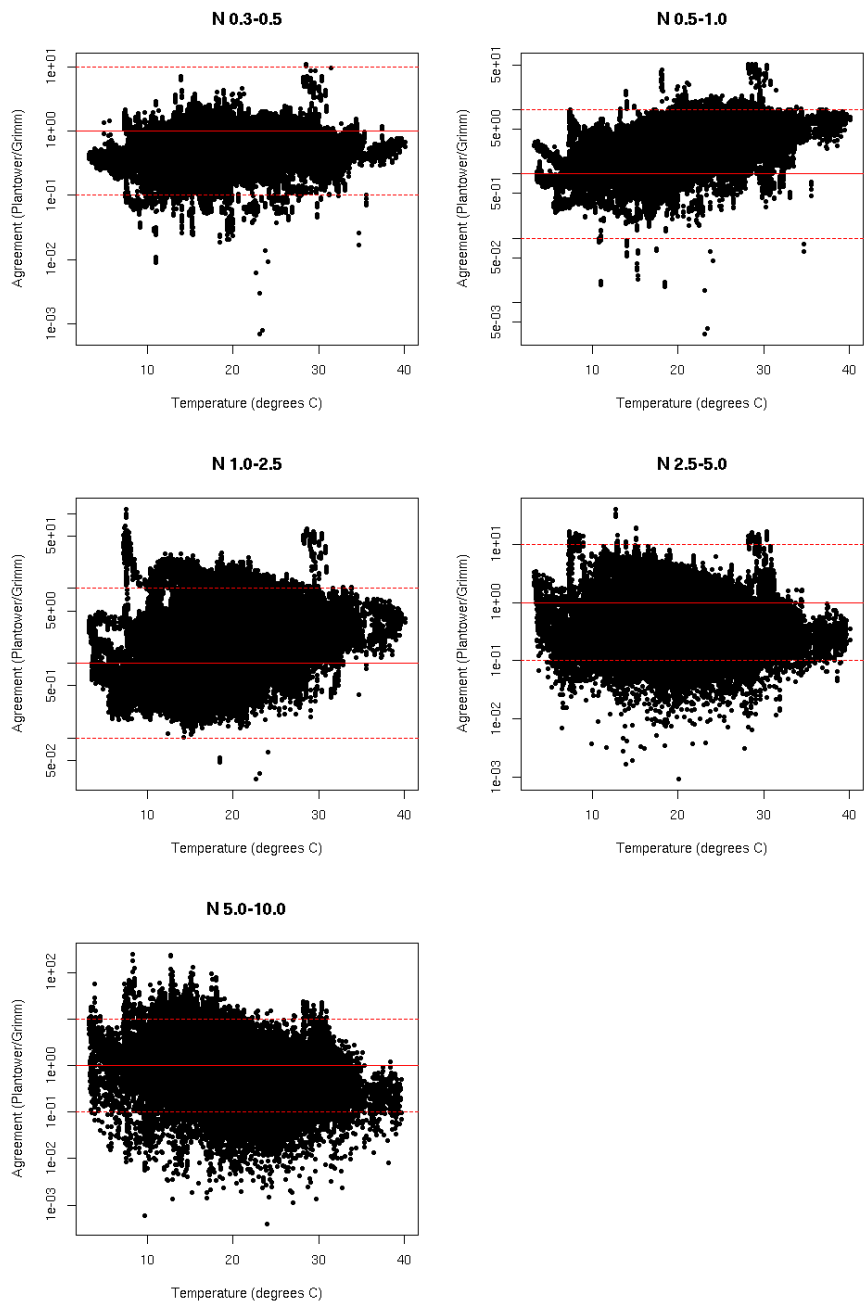

Figure S6: Agreement (ratio of Plantower number concentration to Grimm number concentration) for the five size bins as a function of the ambient temperature.



### S3 – Operations performed to obtain comparable datasets

The goal of these operations is to obtain size classifications that are comparable between both instruments.

$$\begin{aligned} N_{0.3-0.5,PMS5003} &= N_{>0.3,PMS5003} - N_{>0.5,PMS5003} \\ N_{0.3-0.5,GRIMM} &= N_{0.3-0.35,GRIMM} + N_{0.35-0.4,GRIMM} + N_{0.4-0.45,GRIMM} + \\ &N_{0.45-0.5,GRIMM} \end{aligned}$$

$$\begin{aligned} N_{0.5-1.0,PMS5003} &= N_{>0.5,PMS5003} - N_{>1.0,PMS5003} \\ N_{0.5-1.0,GRIMM} &= N_{0.5-0.58,GRIMM} + N_{0.58-0.65,GRIMM} + N_{0.65-0.7,GRIMM} \\ &+ N_{0.7-0.8,GRIMM} + N_{0.8-1.0,GRIMM} \end{aligned}$$

$$\begin{aligned} N_{1.0-2.5,PMS5003} &= N_{>1.0,PMS5003} - N_{>2.5,PMS5003} \\ N_{1.0-2.5,GRIMM} &= N_{1.0-1.3,GRIMM} + N_{1.3-1.6,GRIMM} + N_{1.6-2.0,GRIMM} + \\ &N_{2.0-2.5,GRIMM} \end{aligned}$$

$$\begin{aligned} N_{2.5-5.0,PMS5003} &= N_{>2.5,PMS5003} - N_{>5.0,PMS5003} \\ N_{2.5-5.0,GRIMM} &= N_{2.5-3.0,GRIMM} + N_{3.0-3.5,GRIMM} + N_{3.5-4.0,GRIMM} + \\ &N_{4.0-5.0,GRIMM} \end{aligned}$$

$$\begin{aligned} N_{5.0-10.0,PMS5003} &= N_{>5.0,PMS5003} - N_{>10.0,PMS5003} \\ N_{5.0-10.0,GRIMM} &= N_{5.0-6.5,GRIMM} + N_{6.5-7.5,GRIMM} + N_{7.5-8.0,GRIMM} + \\ &N_{8.0-10.0,GRIMM} \end{aligned}$$

## S4 – Location of the sampling site

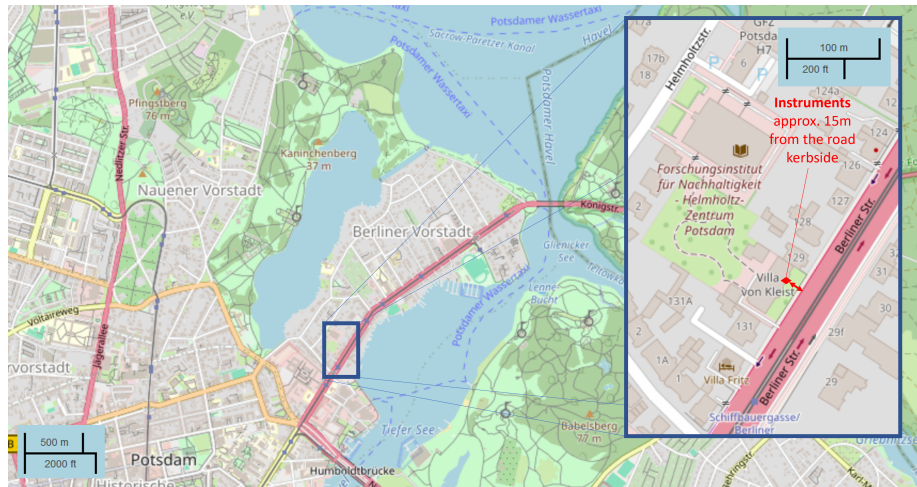

Figure S7: Map showing the location of the sampling site within the city of Potsdam and the location of the instruments with respect to the traffic zone.
